# Supplementary material
Source: publisher figshare collection journal article supplement (https://acs.figshare.com/ndownloader/files/3866134)
Supplement: Supplementary file 1 [file 3866134]

# Supporting Information

## Impact of Environmental Curium on Plutonium Migration and Isotopic Signatures

Hiromu Kurosaki<sup>1</sup>, Daniel I. Kaplan<sup>2</sup>, and Sue B. Clark<sup>1</sup>

<sup>1</sup>Washington State University, Department of Chemistry, P.O. Box 644630, Pullman, WA, 99164-4630

<sup>2</sup>Savannah River National Laboratory, Aiken, SC, 29808

**3 Pages, 2 Tables**

---

**Table S1. Comparison of Two Sampling Locations.**

|                          | INL SDA                                        | SRS F-Area                                              |
|--------------------------|------------------------------------------------|---------------------------------------------------------|
| Waste type               | Solid waste                                    | Liquid waste                                            |
| Disposal type            | Unlined landfill                               | Unlined basin                                           |
| Disposal period          | 1952 ~ 1970                                    | 1955 ~ 1988                                             |
| Area climate             | Dry                                            | Wet                                                     |
| Likely mode of transport | Wind, flooding                                 | Groundwater Flow                                        |
| Sample collection area   | Vicinity of SDA                                | Basin, Downgradient Wells                               |
| Sample collection depth  | 0 ~ 4 cm                                       | 15 ~ 20 m                                               |
| Relevant for this study  | <sup>239, 240, 241</sup> Pu, <sup>241</sup> Am | <sup>239</sup> Pu, <sup>241</sup> Am, <sup>244</sup> Cm |

---

**Alpha Spectrometry.** Alpha activities were measured using an ORTEC OCTETE Plus alpha spectrometry system (ORTEC, Oak Ridge, TN). Most samples were counted for three to five days, depending on the activity level. The alpha peaks used to determine activities were 5485 keV for  $^{241}\text{Am}$ , 5805 keV for  $^{244}\text{Cm}$ , 5499 keV for  $^{238}\text{Pu}$ , 5157 keV for  $^{239}\text{Pu}$ , 5168 keV for  $^{240}\text{Pu}$ . Since  $^{239}\text{Pu}$  and  $^{240}\text{Pu}$  cannot be resolved by alpha spectrometry, their activities are reported as combined  $^{239+240}\text{Pu}$  activity. Background activities were determined by counting for a few months; this activity was subtracted from each spectrum to determine the final activity values.

**ICP-MS.** After alpha spectrometry measurements of the Pu samples, the filters were dissolved with concentrated nitric acid and perchloric acid on a hot plate. This solution was then re-constituted with 1 mL of 2% nitric acid for ICP-MS analysis. Plutonium isotopic ratios were measured using a Thermo Finnigan Element 2 sector field ICP-MS (Thermo Electron Corp., Bremen, Germany). The solution was introduced to the system using a 100  $\mu\text{L}$  / min PFA microflow nebulizer (Elemental Scientific, Inc.; Table S2). Abundance of each isotope was measured by monitoring the channels in the mass range of 235 through 242. For each isotope, counts were monitored for 10 readings and the average was recorded. The tubing was washed with 2 M nitric acid for 60 sec between samples.

---

**Table S2. Mass Spectrometric Parameters.**

|                          |                              |
|--------------------------|------------------------------|
| Plasma power             | 1250 W                       |
| Nebulizer gas flow rate  | 1.05 L / min                 |
| Auxiliary gas flow       | 1 L / min                    |
| Plasma gas flow          | 16 L / min                   |
| Interface cones          | Ni                           |
| Monitored Masses         | 235, 238, 239, 240, 241, 242 |
| Dwell time               | 0.01                         |
| Number of point per peak | 10                           |
| Detector dead time       | 19 ns                        |
| Number of passes         | 10                           |
| Number of runs           | 10                           |
| Resolution setting       | Low (resolution ~ 300)       |

---
